# Supplementary material
Source: Springer Nature journal article supplement (https://www.springermedizin.de/resource/supplementary/12885_2010_2720_MOESM5_ESM.pdf/9461842)

(A)

(B)

(C)

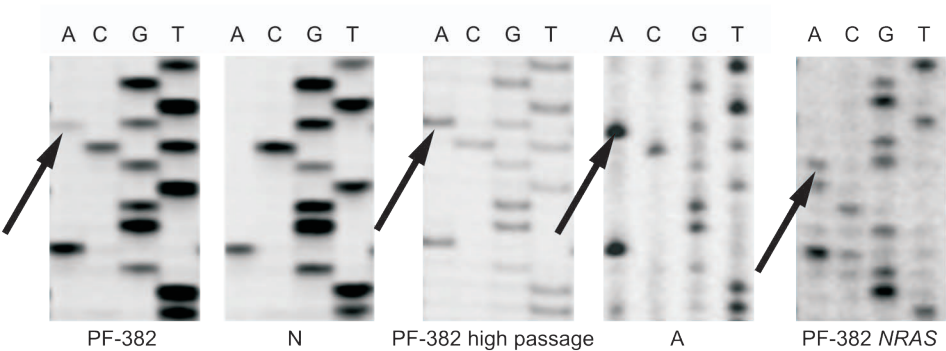

Supplement: MOESM5 [file 9461842]
